# Supplementary material
Source: PubMed Central journal article supplement (PMC7451358)

# Figure S2

## A) Carrier-Probability Threshold

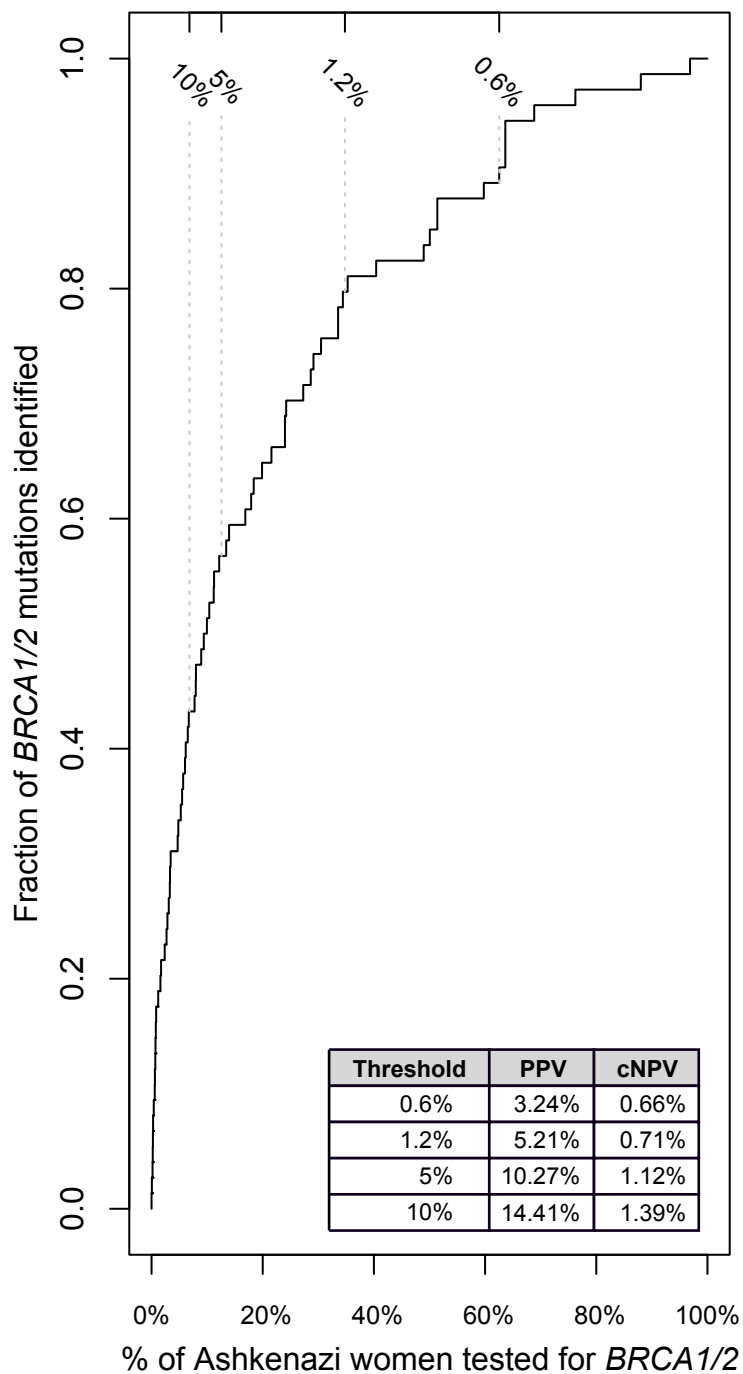

## B) Carrier-Probability Threshold, Women <40

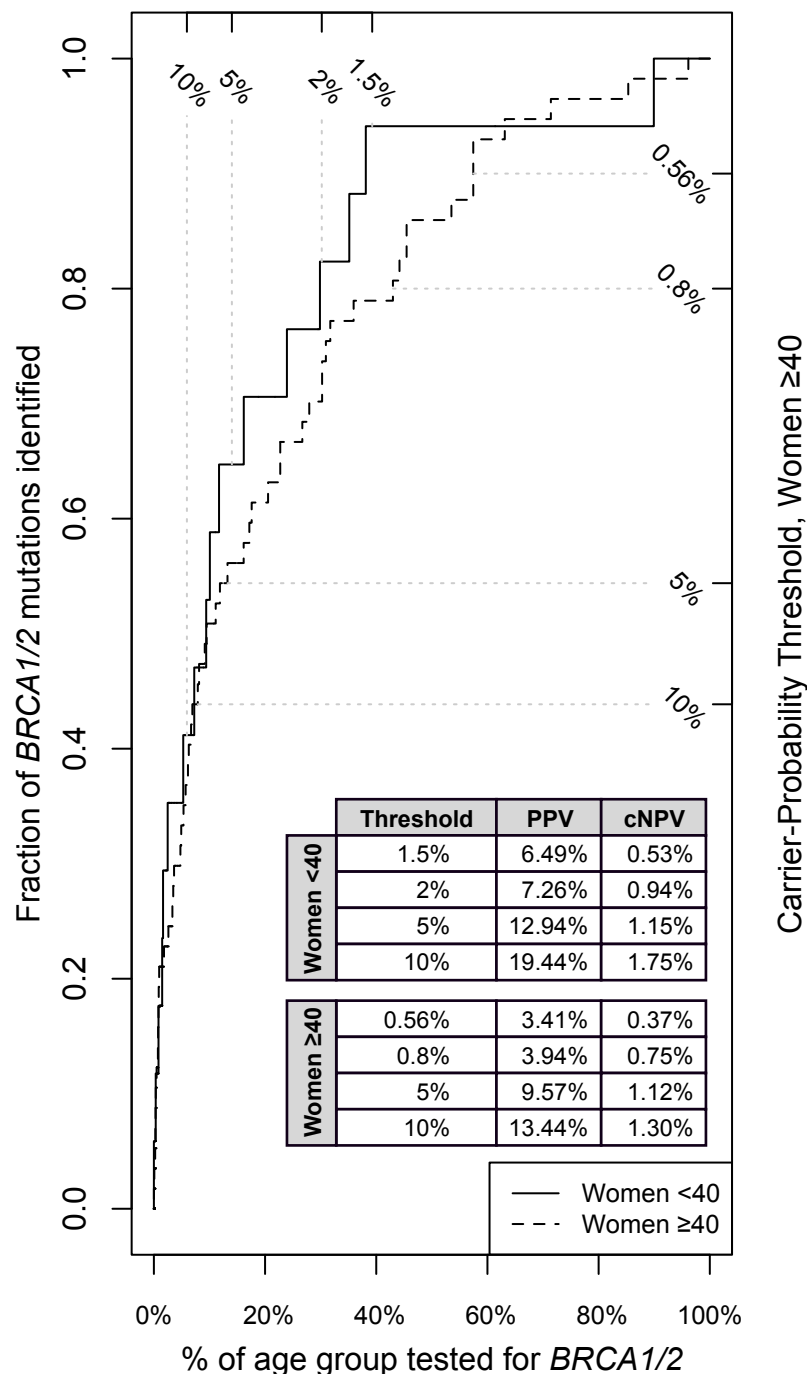

Supplement: NIHMS1619150-supplement-figureS2.pdf [file NIHMS1619150-supplement-figureS2.pdf]
